# Supplementary material for: 4C-seq revealed long-range interactions of a functional enhancer at the 8q24 prostate cancer risk locus
Source: PubMed Central journal article supplement (PMC4776156; doi:10.1038/srep22462), 2016-03-03
Supplement: srep22462-s1.pdf [file srep22462-s1.pdf]

# **4C-seq revealed long-range interactions of a functional enhancer at the 8q24 prostate cancer risk locus**

Mingyang Cai<sup>1,2,3</sup>, Sewoon Kim<sup>1</sup>, Kai Wang<sup>2,3,4</sup>, Peggy J. Farnham<sup>5,6</sup>, Gerhard A. Coetzee<sup>7,8,9</sup>, Wange Lu<sup>1,\*</sup>

<sup>1</sup>Eli and Edythe Broad Center for Regenerative Medicine and Stem Cell Research, Department of Stem Cell Biology and Regenerative Medicine, <sup>2</sup>Zilkha Neurogenetic Institute, <sup>3</sup>Division of Biostatistics, Department of Preventive Medicine, <sup>4</sup>Department of Psychiatry, <sup>5</sup>Norris Comprehensive Cancer Center, <sup>6</sup>Department of Biochemistry and Molecular Biology, <sup>7</sup>Department of Preventive Medicine, <sup>8</sup>Department of Urology, Keck School of Medicine, University of Southern California, Los Angeles, CA 90033, U.S.A.

<sup>9</sup>Present affiliation: Van Andel Institute, Grand Rapids, MI 49503

\*Correspondence should be addressed to: [wangelu@usc.edu](mailto:wangelu@usc.edu)

## Supplementary information

### Figure S1

Circos plots showing the genome-wide interacting partners with the enhancer bait in two biological replicates (BRs) of LNCaP and C4-2B. Inter-chromosomal interactions (*trans*) are shown in blue, while intra-chromosomal (*cis*) interactions are shown in red.

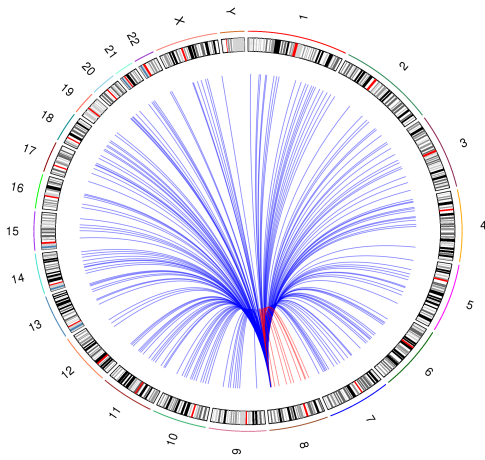

LNCaP\_BR1

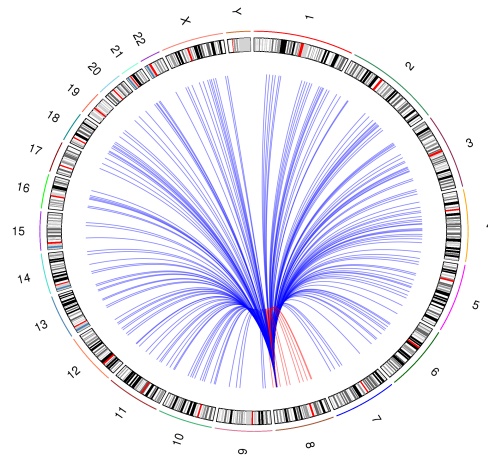

LNCaP\_BR2

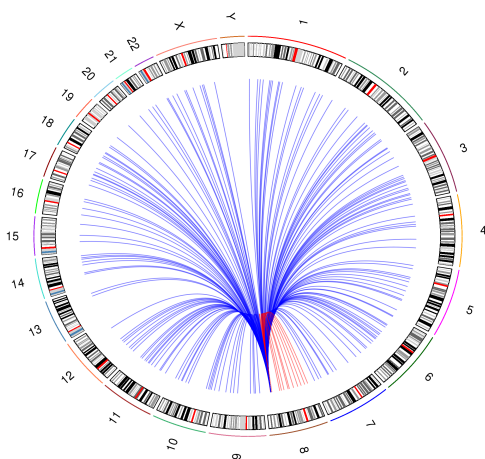

C4-2B\_BR1

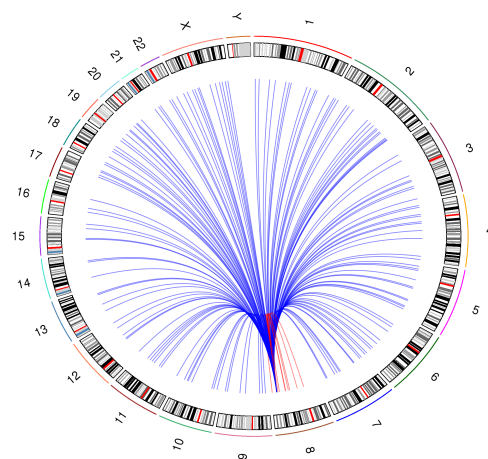

C4-2B\_BR2

**Table S1**

Table of independent associations with prostate cancer, revealed by GWAS. Index-SNPs, nearby genes, distance to 4C sites in LNCaP and C4-2B are shown.

| #  | Loci     | SNP         | Gene                | distance (bp) to 4C sites |         |
|----|----------|-------------|---------------------|---------------------------|---------|
|    |          |             |                     | LNCaP                     | C42B    |
| 1  | 1p35     | rs636291    | <i>PEX14</i>        | 310044                    | 997082  |
| 2  | 1q21     | rs17599629  | <i>GOLPH3L</i>      | 1711394                   | 837052  |
| 3  | 1q32     | rs1775148   | <i>SLC41A1</i>      | 126163                    | 627348  |
| 4  | 1q32.1   | rs4245739   | <i>MDM4</i>         | 1112814                   | 575268  |
| 5  | 2p25     | rs9287719   | <i>NOL10</i>        | 456039                    | 592563  |
| 6  | 2p24.1   | rs13385191  | <i>C2orf43</i>      | 1394299                   | 155596  |
| 7  | 2p21     | rs1465618   | <i>THADA</i>        | 287592                    | 6140457 |
| 8  | 2p15     | rs6545977   | <i>EHBPI</i>        | 489345                    | 2483152 |
| 9  | 2p15     | rs721048    | <i>EHBPI, OTX1</i>  | 319912                    | 2652585 |
| 10 | 2p11.2   | rs10187424  | <i>GGCX</i>         | 420743                    | 1357183 |
| 11 | 2q31.1   | rs12621278  | <i>ITGA6</i>        | 2075987                   | 281819  |
| 12 | 2q37.3   | rs2292884   | <i>MPLH</i>         | 2497161                   | 3657768 |
|    |          | rs7584330   | <i>MPLH</i>         | 2441163                   | 3713766 |
| 13 | 3p22.2   | rs9311171   | <i>CTDSPL</i>       | 1302230                   | 1134408 |
| 14 | 3p12.1-2 | rs17181170  | <i>CHMP2B</i>       | 1028922                   | 7346458 |
| 15 | 3p12.1-2 | rs2660753   | <i>CHMP2B</i>       | 966272                    | 7283808 |
|    |          | rs9284813   | <i>CHMP2B</i>       | 1007767                   | 7325303 |
| 16 | 3p12.1-2 | rs7629490   | <i>CHMP2B</i>       | 1097095                   | 7414631 |
| 17 | 3q21.3   | rs10934853  | <i>GATA2</i>        | 955135                    | 504408  |
| 18 | 3q23     | rs6763931   | <i>ZBTB38</i>       | 1398966                   | 1187267 |
| 19 | 3q24     | rs345013    | <i>PLOD2</i>        | 464188                    | 2342232 |
| 20 | 3q26.2   | rs10936632  | <i>CLDN11, SKIL</i> | 368319                    | 1739541 |
| 21 | 4q13     | rs10009409  | <i>COX18</i>        | 537144                    | 1156742 |
| 22 | 4q22.3   | rs17021918  | <i>PDLIM5</i>       | 239550                    | 1841827 |
| 23 | 4q22.3   | rs12500426  | <i>PDLIM5</i>       | 191282                    | 1890095 |
| 24 | 4q24     | rs7679673   | <i>TET2</i>         | 1597460                   | 2524355 |
| 25 | 5p15.33  | rs2242652   | <i>TERT</i>         | 971319                    | 1375285 |
| 26 | 5p15.33  | rs12653946  | <i>LPCAT1</i>       | 355518                    | 759484  |
| 27 | 5p12     | rs2121875   | <i>FGF10</i>        | 624378                    | 2958808 |
| 28 | 5q14.3   | rs4466137   | <i>HAPLN1</i>       | 464022                    | 2003639 |
| 29 | 5q23.1   | rs37181     | <i>COMMD10</i>      | 313759                    | 544806  |
| 30 | 6p24     | rs4713266   | <i>NEDD9</i>        | 214340                    | 119101  |
| 31 | 6p22     | rs115457135 | <i>TRIM31</i>       | 2725875                   | 4054106 |
| 32 | 6p21     | rs115306967 | <i>HLA-DRB6</i>     | 1334532                   | 3504907 |
| 33 | 6p21.1   | rs1983891   | <i>FOXP4</i>        | 1039928                   | 53652   |
| 34 | 6p12.2   | rs10498792  | <i>PKHD1</i>        | 155463                    | 1037820 |

|    |          |             |                           |         |         |
|----|----------|-------------|---------------------------|---------|---------|
| 35 | 6q14     | rs9443189   | <i>MYO6</i>               | 2099055 | 1655131 |
| 36 | 6q22.2   | rs339331    | <i>RFX6</i>               | 188930  | 3965316 |
| 37 | 6q25.3   | rs651164    | <i>IGF2R</i>              | 1135518 | 1365600 |
| 38 | 6q25.3   | rs9364554   | <i>SLC22A3</i>            | 883228  | 1617890 |
| 39 | 7p15.3   | rs12155172  | <i>RPL23P8</i>            | 100986  | 1126916 |
| 40 | 7p15.2   | rs10486567  | <i>JAZF1</i>              | 497289  | 248562  |
| 41 | 7p12     | rs56232506  | <i>TNS3</i>               | 221719  | 1081958 |
| 42 | 7q21.3   | rs6465657   | <i>LMTK2</i>              | 1241326 | 959941  |
| 43 | 8p21.2   | rs1512268   | <i>NKX3-1</i>             | 222633  | 629826  |
| 44 | 8q24.21  | rs12543663  | <i>LOC727677,<br/>MYC</i> | 20668   | 28124   |
| 45 | 8q24.21  | rs10086908  | <i>POU5F1B,<br/>MYC</i>   | 42405   | 25033   |
| 46 | 8q24.21  | rs1016343   | <i>POU5F1B,<br/>MYC</i>   | 36460   | 29396   |
| 47 | 8q24.21  | rs13252298  | <i>PCATI, MYC</i>         | 34601   | 31255   |
| 48 | 8q24.21  | rs1456315   | <i>PCATI, MYC</i>         | 25820   | 40036   |
|    |          | rs13254738  | <i>PCATI, MYC</i>         | 25414   | 40442   |
| 49 | 8q24.21  | rs6983561   | <i>PCATI, MYC</i>         | 22877   | 42979   |
| 50 | 8q24.21  | rs188140481 | <i>PCATI, MYC</i>         | 8851    | 16940   |
| 51 | 8q24.21  | rs16902094  | <i>PCATI, MYC</i>         | 15931   | 13759   |
| 52 | 8q24.21  | rs445114    | <i>PCATI, MYC</i>         | 13096   | 10924   |
| 53 | 8q24.21  | rs6983267   | <i>PCATI, MYC</i>         | 3497    | 3497    |
| 54 | 8q24.21  | rs7000448   | <i>LOC727677,<br/>MYC</i> | 2361    | 14526   |
| 55 | 8q24.21  | rs1447295   | <i>POU5F1B,<br/>MYC</i>   | 2766    | 1044    |
|    |          | rs4242382   | <i>POU5F1B,<br/>MYC</i>   | 185     | 3021    |
|    |          | rs4242384   | <i>POU5F1B,<br/>MYC</i>   | 1166    | 4002    |
|    |          | rs7837688   | <i>POU5F1B,<br/>MYC</i>   | 8771    | 8771    |
| 56 | 9p21     | rs17694493  | <i>CDKN2B-AS1</i>         | 799273  | 657023  |
| 57 | 9q31.2   | rs817826    | <i>KLF4</i>               | 39701   | 3869987 |
| 58 | 9q33.2   | rs1571801   | <i>DAB2IP</i>             | 237755  | 1871944 |
| 59 | 10q11    | rs76934034  | <i>MARCH8</i>             | 331021  | 187871  |
| 60 | 10q11.23 | rs10993994  | <i>NCOA4</i>              | 1170352 | 5654380 |
|    |          | rs3123078   | <i>NCOA4</i>              | 1145827 | 5629855 |
| 61 | 10q26.12 | rs11199874  | <i>FGFR2</i>              | 62928   | 139096  |
| 62 | 10q26.13 | rs4962416   | <i>CTBP2</i>              | 313181  | 2092329 |
| 63 | 11p15.5  | rs7127900   | <i>IGF2</i>               | 1468702 | 982779  |
| 64 | 11q13.2  | rs10896449  | <i>CCND1</i>              | 327389  | 810062  |
|    |          | rs7931342   | <i>CCND1</i>              | 327559  | 809892  |
| 65 | 11q13.2  | rs12418451  | <i>CCND1</i>              | 386637  | 750814  |

|     |          |             |                     |         |          |
|-----|----------|-------------|---------------------|---------|----------|
| 66  | 11q13.2  | rs11228565  | <i>CCND1</i>        | 343476  | 793975   |
|     |          | rs7130881   | <i>CCND1</i>        | 326098  | 811353   |
| 67  | 11q23    | rs11214775  | <i>HTR3B</i>        | 810046  | 1596593  |
| 68  | 12q13    | rs80130819  | <i>RPI-228P16.4</i> | 402683  | 137657   |
| 69  | 12q13.12 | rs731236    | <i>VDR</i>          | 221822  | 43199    |
| 70  | 12q13.13 | rs10875943  | <i>TUBA1C</i>       | 1368181 | 1394049  |
| 71  | 12q13.2  | rs902774    | <i>KRT8</i>         | 22319   | 1737763  |
| 72  | 12q21.31 | rs12827748  | <i>PAWR</i>         | 614987  | 1877260  |
| 73  | 13q22.1  | rs9600079   | <i>KLF5</i>         | 230010  | 1821369  |
| 74  | 13q33.2  | rs1529276   | <i>MIR548AS</i>     | 120103  | 1555014  |
| 75  | 14q23    | rs7153648   | <i>SIX1</i>         | 964273  | 3182251  |
| 76  | 14q24    | rs8014671   | <i>TTC9</i>         | 75      | 70518    |
| 77  | 15q21.1  | rs4775302   | <i>SQRDL</i>        | 1417417 | 1935283  |
| 78  | 16q22    | rs12051443  | <i>PHLPP2</i>       | 2601204 | 1394237  |
| 79  | 17p13.3  | rs684232    | <i>VPS53</i>        | 4597918 | 11369793 |
| 80  | 17q21.2  | rs7501939   | <i>HNF1B</i>        | 2150905 | 491126   |
|     |          | rs4430796   | <i>HNF1B</i>        | 2147789 | 488010   |
| 81  | 17q21.2  | rs11649743  | <i>HNF1B</i>        | 2124728 | 464949   |
| 82  | 17q21.33 | rs138213197 | <i>HOXB13</i>       | 1589507 | 1354511  |
| 83  | 17q21.33 | rs11650494  | <i>ZNF652</i>       | 2128988 | 815030   |
| 84  | 17q21.33 | rs7210100   | <i>ZNF652</i>       | 2186070 | 723467   |
| 85  | 17q25.1  | rs1859962   | <i>BC039327</i>     | 114025  | 1856982  |
| 86  | 19q13.4  | rs103294    | <i>LILRA3</i>       | 101827  | 2972421  |
| 87  | 19q13.11 | rs8102476   | <i>SPINT2</i>       | 3055381 | 13089809 |
| 88  | 19q13.12 | rs887391    | <i>LOC100505495</i> | 194625  | 9839798  |
| 89  | 19q13.32 | rs2735839   | <i>KLK3</i>         | 1614289 | 460799   |
| 90  | 20q13    | rs12480328  | <i>ADNP</i>         | 47254   | 1181529  |
| 91  | 21q22    | rs1041449   | <i>TMPRSS2</i>      | 478838  | 2591338  |
| 92  | 22q11    | rs2238776   | <i>TBX1</i>         | 3346645 | 1811536  |
| 93  | 22q13.1  | rs9623117   | <i>TNRC6B</i>       | 216549  | 1830151  |
| 94  | 22q13.2  | rs742134    | <i>PACSLN2</i>      | 1825421 | 1236000  |
| 95  | 22q13.2  | rs5759167   | <i>BIK</i>          | 1807358 | 1217937  |
| 96  | Xp11     | rs2807031   | <i>XAGE3</i>        | 1780960 | 9017210  |
| 97  | Xp11.22  | rs5945572   | <i>NUDT11</i>       | 3448226 | 10684476 |
|     |          | rs5945619   | <i>NUDT11</i>       | 3436237 | 10672487 |
|     |          | rs1327301   | <i>NUDT11</i>       | 3467852 | 10704102 |
| 98  | Xq12     | rs5919432   | <i>AR</i>           | 699867  | 1560291  |
| 99  | Xq13     | rs6625711   | <i>SLC7A</i>        | 1752304 | 1277068  |
| 100 | Xq13     | rs4844289   | <i>NLGN3-BCYRN1</i> | 1484171 | 1008935  |

**Table S2**

Enriched MSigDB Perturbation terms related with cancer and reported by GREAT.  
The results of LNCaP and C4-2B are shown in (A) and (B) respectively.

**A**

| <b>LNCaP</b>                                                                                                                                                                 |                |                                                                                                                                                                                                                            |
|------------------------------------------------------------------------------------------------------------------------------------------------------------------------------|----------------|----------------------------------------------------------------------------------------------------------------------------------------------------------------------------------------------------------------------------|
| <b>MSigDB Perturbation terms</b>                                                                                                                                             | <b>p-value</b> | <b>genes</b>                                                                                                                                                                                                               |
| Genes bound by ESR1 [GeneID=2099] and down-regulated by estradiol [PubChemID=5757] in MCF-7 cells (breast cancer) expressing constitutively active form of AKT1 [GeneID=207] | 3.266e-11      | CDYL2, CPEB4, DLL1, EDN2, ESR1, FAM84B, GABBR2, GPD2, IL1R1, LMBRD1, MKX, NPAS3, PPAP2B, PSD3, S1PR3, SEMA3E, SHROOM3, ST8SIA4, SYTL2, TGFB2, TLE1, UBE2H, YPEL2, ZDHHC7, ZMYND8                                           |
| Genes up-regulated in A549 cells (lung cancer) expressing MIRLET7A3 [GeneID=406883] microRNA off a plasmid vector                                                            | 6.439e-11      | ADCK2, ARHGAP26, BCHE, BTG1, CHGB, COX7C, CPEB4, CTH, DKK1, EHBP1, ETNK1, FAM84B, FAT1, FGL1, FOXA1, FOXC1, GJA1, GLIS3, GLRX, KLF4, LYST, MAGEA6, PLA2G4A, PTPN12, REG3G, SLC38A2, TFPI, THSD4, THSD7A, USP32             |
| Genes present but differentially expressed between Hep3B cells (hepatocellular carcinoma, HCC) with RNAi knockdown of SDHB [GeneID=6390] and control cells                   | 1.390e-9       | A2M, AGTR1, CDH6, CTBP2, CYB561, FAM84B, FLRT2, GJA1, GPRC5B, GULP1, HDAC9, HS3ST3B1, ISX, ITPR2, MICAL2, NUA1, PAG1, PKHD1, PRRX1, SERPINE2, SH3BGRL, SIPA1L2, STEAP1, TFAP2A, TGFB2, THBS4, TNFRSF19, TNFSF4, TTR, VGLL3 |
| Genes bound by ESR1 [GeneID=2099] and down-regulated by estradiol [PubChemID=5757] in MCF-7 cells (breast cancer)                                                            | 2.602e-9       | ANK3, CDYL2, CHRM3, CPEB4, DLL1, EDN2, ESR1, EXT1, FAM84B, FRMD6, GATA3, KCTD18, NPAS3, PBX1, PSD3, PTPRK, RERE, S1PR3, SEMA3E, SHROOM3, SLITRK6, SMAD3, SYTL2, TGFB2, TLE1, TNFRSF19, TNS3, TRAM2, UBE2H, YPEL2           |

**B**

| <b>C4-2B</b>                                                                                                                                                                 |                |                                                                                                                                                                                          |
|------------------------------------------------------------------------------------------------------------------------------------------------------------------------------|----------------|------------------------------------------------------------------------------------------------------------------------------------------------------------------------------------------|
| <b>MSigDB Perturbation terms</b>                                                                                                                                             | <b>p-value</b> | <b>genes</b>                                                                                                                                                                             |
| Genes within amplicon 8q23-q24 identified in a copy number alterations study of 191 breast tumor samples                                                                     | 2.261e-27      | COL14A1, ENPP2, FAM84B, FER1L6, GML, HAS2, LY6D, MAL2, MED30, MRPL13, MTSS1, MYC, NOV, PTP4A3, RAD21, SLC30A8, SLURP1, THEM6, TMEM65, TMEM74, TRIB1, TRPS1, TSNARE1, UTP23, ZHX2, ZNF572 |
| Genes bound by ESR1 [GeneID=2099] and down-regulated by estradiol [PubChemID=5757] in MCF-7 cells (breast cancer) expressing constitutively active form of AKT1 [GeneID=207] | 2.638e-11      | ARID5B, CGN, EPS8, FAM84B, GABBR2, GALNT10, GRHL1, KLF9, MKX, NPAS3, PPAP2B, PSD3, SLC22A23, TGFB2, ZNF277                                                                               |
